# Supplementary material for: Cost-effective chloramphenicol residue monitoring in food-producing animal samples: a hybrid QuEChERS–MIP extraction method coupled with chrome azurol S spectrophotometry
Source: Royal Society of Chemistry journal article supplement (doi:10.1039/d5ay01284h), 2026-01-01
Supplement: d5ay01284h1.pdf [file d5ay01284h1.pdf]

Summary of Optimized Parameters

The following table consolidates the optimized parameters for the modified QuEChERS extraction and CAS/Fe(III) colorimetric assay, ensuring reproducibility and sensitivity for CAP determination in food matrices:

Table S1: Optimized Parameters for QuEChERS Extraction and CAS/Fe(III) Assay

| Parameter                            | Optimized Value                               | Significance                                                          |
|--------------------------------------|-----------------------------------------------|-----------------------------------------------------------------------|
| QuEChERS Extraction                  |                                               |                                                                       |
| Solvent Composition                  | ACN:acetone:H <sub>2</sub> O (75:20:5, v/v/v) | Enhanced CAP solubility (15.8 mg/mL) and reduced matrix effects (9%). |
| Solvent Volume                       | 10 mL per 5 g sample                          | Balanced recovery (94%) and minimized lipid co-extraction.            |
| Salt Ratio (MgSO <sub>4</sub> :NaCl) | 4:1 (6 g:1.5 g)                               | Efficient phase separation and emulsification prevention.             |
| Extraction Time                      | 10 min                                        | Equilibrium partitioning with minimal matrix interference.            |
| CAS/Fe(III) Assay                    |                                               |                                                                       |

| Parameter             | Optimized Value                       | Significance                                                      |
|-----------------------|---------------------------------------|-------------------------------------------------------------------|
| CAS Concentration     | 0.1% (w/v) in acetate buffer (pH 5.5) | Maximized ternary complex formation; minimal background noise.    |
| Fe(III) Concentration | 1 mM in 0.1 M HCl                     | Stoichiometric binding without precipitation.                     |
| pH                    | 5.5 (acetate buffer)                  | Optimal hydroxyl deprotonation and Fe(III) stability.             |
| Reaction Time         | 10 min at 25°C                        | Equilibrium achieved; avoids matrix interference.                 |
| Temperature           | 25°C                                  | Ideal kinetics and stability; aligns with ambient lab conditions. |
